# Supplementary material for: Pronounced changes in atomistic mechanisms for the Cl− + CH3I SN2 reaction with increasing collision energy
Source: Royal Society of Chemistry journal article supplement (doi:10.1039/c8cp06198j), 2019-01-01
Supplement: c8cp06198j1.pdf [file c8cp06198j1.pdf]

## Supporting Information

### **Pronounced Changes in Atomistic Mechanisms for the $\text{Cl}^- + \text{CH}_3\text{I}$ $\text{S}_{\text{N}}2$ Reaction with Increasing Collision Energy**

Subha Pratihara<sup>a</sup>, Maria Carolina B. Muniz<sup>b</sup>, Xinyou Ma<sup>a</sup>,  
Itamar Borges Jr.<sup>b</sup>, and W. L. Hase<sup>a</sup>

<sup>a</sup>Department of Chemistry and Biochemistry  
Texas Tech University  
Lubbock, Texas 79409

<sup>b</sup>Departamento de Química  
Instituto Militar de Engenharia  
Praça General Tibúrcio  
Rio de Janeiro, RJ 22290-270, Brazil

**Table 1.** Numbers of Trajectories for Different Indirect Mechanisms<sup>a</sup>

| Erel           | A  | B | A+B | Ra    | br | A+B+br | Ra+A   | Ra+B  | Ra+A+B | Ra+A+br | Ra+B+br | Ra+A+B+br | Ra+br | Ra+B+Ra' |
|----------------|----|---|-----|-------|----|--------|--------|-------|--------|---------|---------|-----------|-------|----------|
| <b>b = 0 Å</b> |    |   |     |       |    |        |        |       |        |         |         |           |       |          |
| 0.15           | 7  | 1 | 6   | 1, 2  |    |        | 11, 15 |       | 2, 3   | - , 2   |         |           |       |          |
| 0.20           | 5  |   |     | 2, 4  | 1  | 1      | 1, 4   | 1, -  | - , 1  |         |         |           |       | 2        |
| 0.25           | 3  |   |     | 3, 5  |    | 2      | 6, 3   |       | - , 5  |         |         |           | 1, -  |          |
| 0.30           | 2  |   | 1   | 3, 3  | 1  |        | 1, 1   |       | 1, 1   | - , 1   |         | 1, -      |       |          |
| 0.35           |    |   |     | 2, -  |    |        | 1, 3   |       |        |         |         |           |       | 1        |
| 0.40           | 3  |   | 1   | - , 4 |    |        | - , 1  | - , 1 |        |         |         |           |       | 1        |
| <b>b = 1 Å</b> |    |   |     |       |    |        |        |       |        |         |         |           |       |          |
| 0.15           | 11 |   | 7   | 1, 6  | 1  | 1      | 3, 15  |       | 2, 2   | 1, -    | - , 1   | - , 1     |       |          |
| 0.20           | 5  |   |     | 2, 4  |    | 1      | 1, 6   |       | - , 2  | 1, -    |         |           | - , 1 |          |
| 0.25           | 1  |   | 1   | 3, 2  |    |        | 2, 5   |       | 1, 1   | 1, 2    |         |           |       |          |
| 0.30           | 4  | 2 |     | 1, -  |    |        | 5, 2   |       |        |         |         |           | - , 1 |          |
| 0.35           | 4  |   |     | 1, -  |    |        | 3, 6   |       |        | - , 1   |         |           |       |          |
| 0.40           |    |   | 1   | 2, 1  |    |        | - , 2  | 1, -  |        |         |         |           | - , 1 |          |
| <b>b = 2 Å</b> |    |   |     |       |    |        |        |       |        |         |         |           |       |          |
| 0.25           | 8  | 1 | 5   | 2, 1  | 1  |        | 2, 7   |       | 1, -   |         |         |           |       |          |
| 0.30           | 5  |   | 5   | - , 1 |    | 1      | 1, 1   |       | - , 1  |         |         |           |       |          |
| 0.35           | 3  |   | 3   | - , 1 |    |        | 2, -   |       |        |         |         |           |       |          |

a. Mechanisms are defined in Table 1 of the manuscript. Total numbers of trajectories are given in Table 2 of the manuscript.

b. Collision energy in eV.

c. The first number is for Ra(1) and the second for Ra(n)

d. Ra' is roundabout motion of CH<sub>3</sub> moiety around the I<sup>-</sup> after formation of the post-reaction complex.

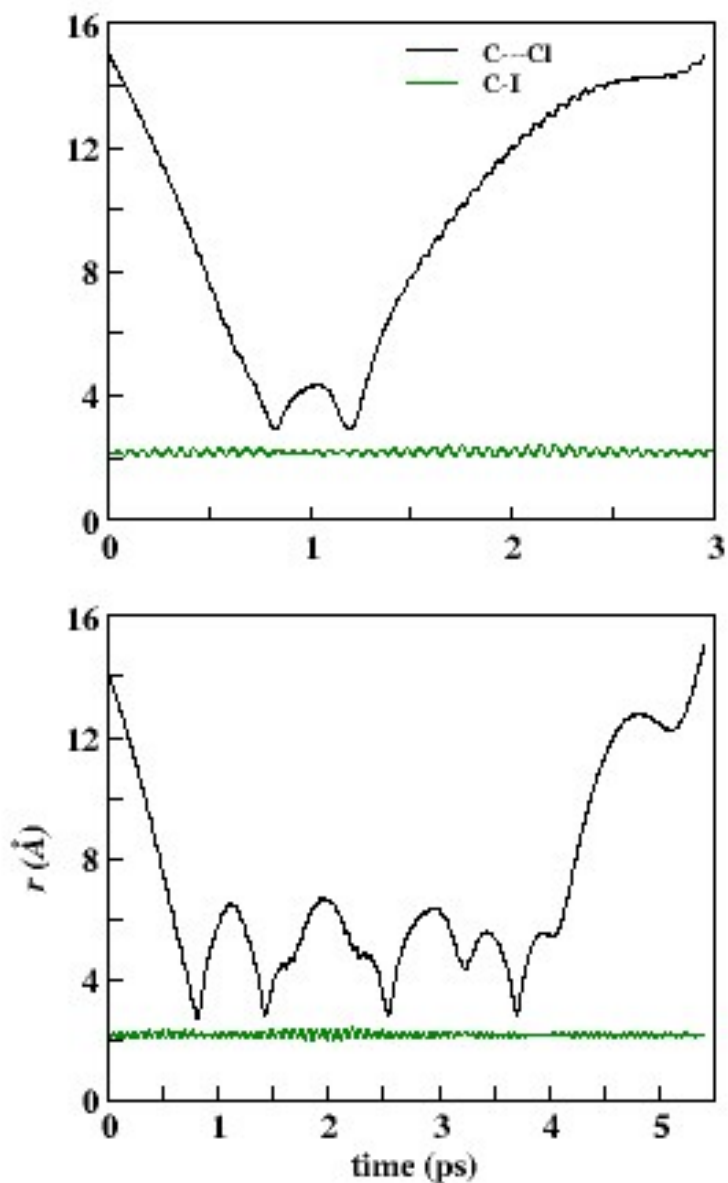

**Figure 1:** Sample representation of two typical non-reactive trajectories with complexation.

Top panel: A short lived pre-reaction complex formation followed by reverse reaction.

Bottom panel: A comparatively long-lived pre-reaction complex formation with multiple rotation of -CH<sub>3</sub> moiety around I, followed by reaction.

[Animations of these types of non-reactive trajectories are provided on [hase-group.ttu.edu/group/animations/ch3i.html](http://hase-group.ttu.edu/group/animations/ch3i.html)]
